# Supplementary material for: A One-Pot Convenient RPA-CRISPR-Based Assay for Salmonella enterica Serovar Indiana Detection
Source: MDPI journal article supplement (doi:10.3390/microorganisms12030519), 2024-03-05
Supplement: s1 [file s1]

## Supplementary files

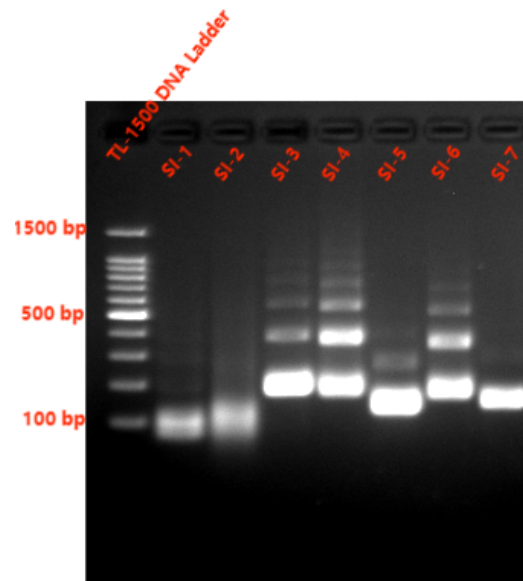

Supplementary Figure S1. The amplification products of RPA assay by using 7 pair's primers.
